# Supplementary material for: Quantification of the dust optical depth across spatiotemporal scales with the MIDAS global dataset (2003–2017)
Source: Copernicus journal article supplement (doi:10.5194/acp-2021-572), 2021-07-19
Supplement: Supplementary file 1 [file acp-2021-572-supplement.pdf]

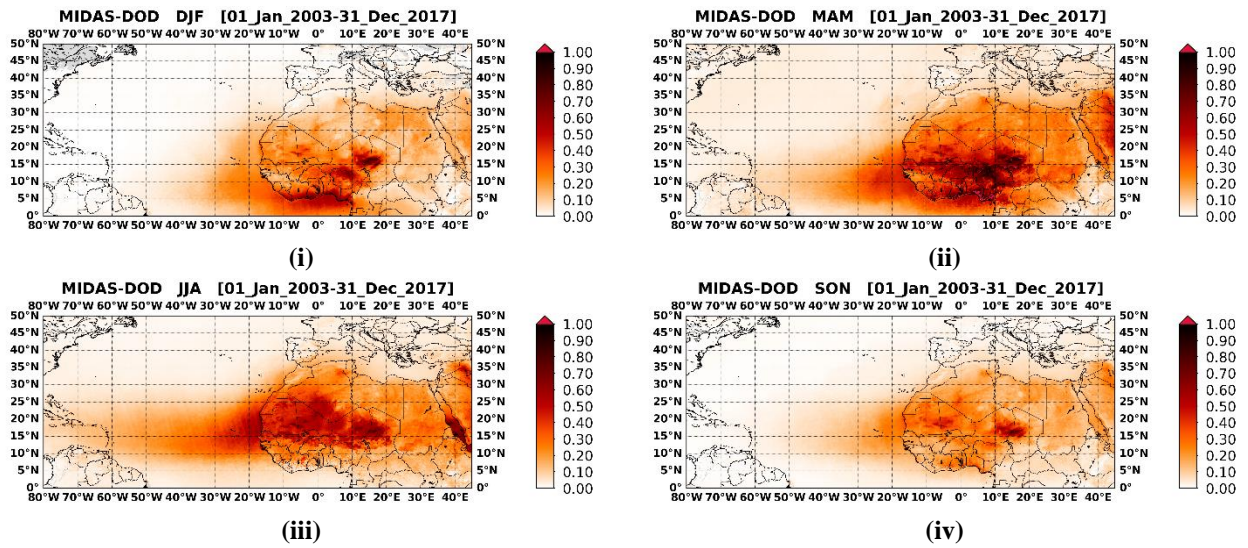

**Figure S1:** Seasonal geographical distributions of the MIDAS fine spatial resolution ( $0.1^\circ \times 0.1^\circ$ ) DOD, across North Africa, the Tropical Atlantic Ocean and the broader Mediterranean basin, corresponding to: (i) December-January-February (DJF), (ii) March-April-May (MAM), (iii) June-July-August (JJA) and (iv) September-October-November (SON), averaged over the period 2003-2017. Grey color represents areas with absence of data.

MIDAS-DOD DJF [01\_Jan\_2003-31\_Dec\_2017]

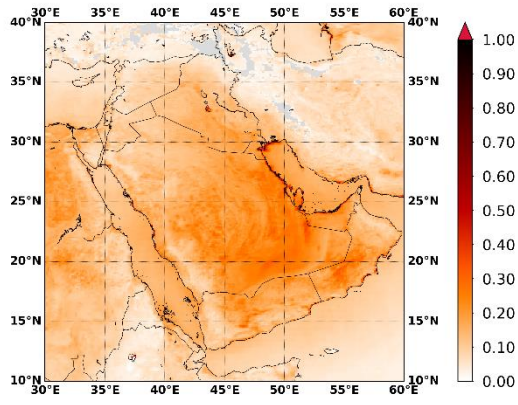

(i)

MIDAS-DOD MAM [01\_Jan\_2003-31\_Dec\_2017]

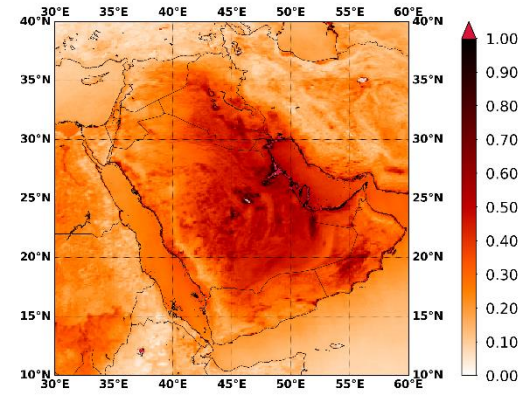

(ii)

MIDAS-DOD JJA [01\_Jan\_2003-31\_Dec\_2017]

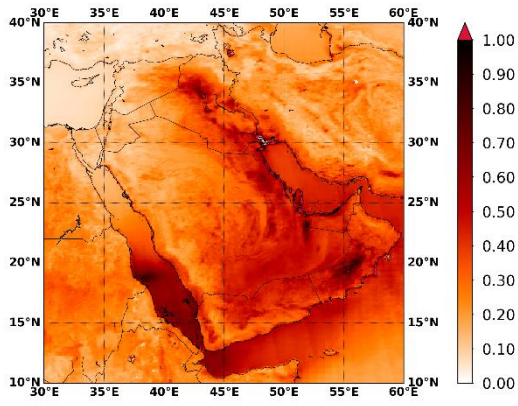

(iii)

MIDAS-DOD SON [01\_Jan\_2003-31\_Dec\_2017]

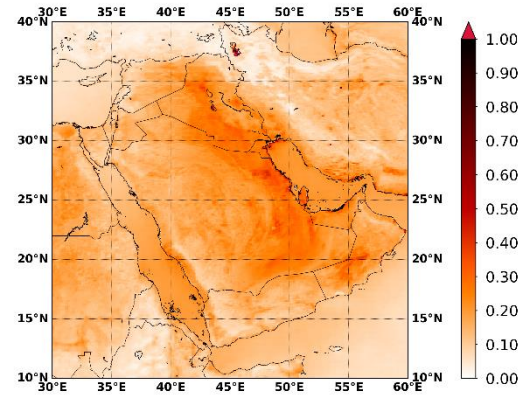

(iv)

Figure S2: As in Figure S1 but for the Middle East.

MIDAS-DOD DJF [01\_Jan\_2003-31\_Dec\_2017]

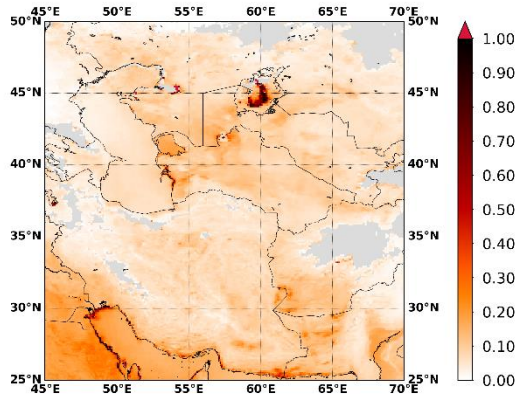

(i)

MIDAS-DOD MAM [01\_Jan\_2003-31\_Dec\_2017]

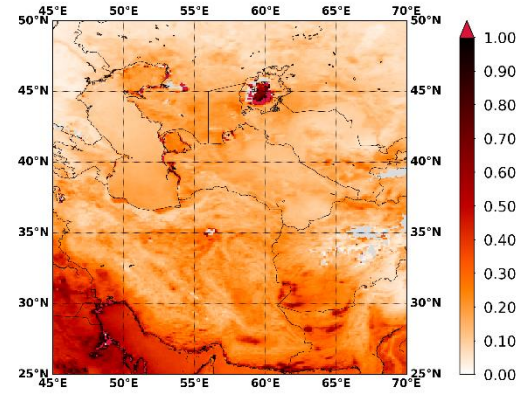

(ii)

MIDAS-DOD JJA [01\_Jan\_2003-31\_Dec\_2017]

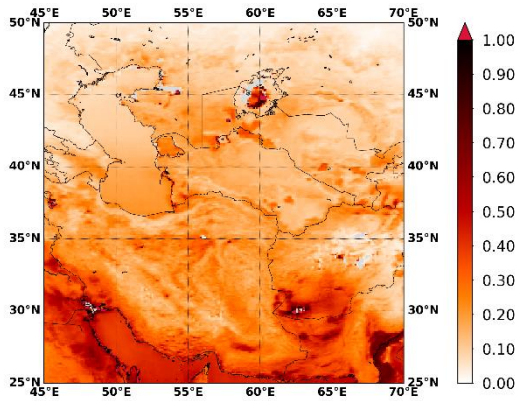

(iii)

MIDAS-DOD SON [01\_Jan\_2003-31\_Dec\_2017]

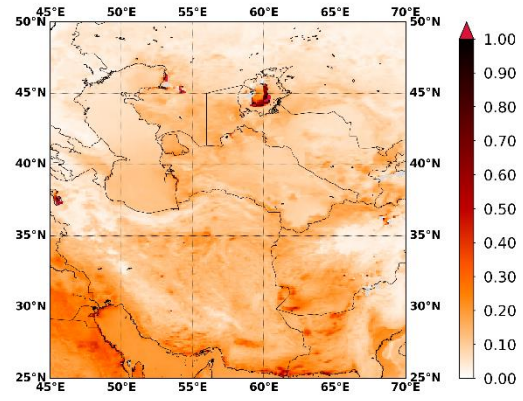

(iv)

Figure S3: As in Figure S1 but for the central and southwest Asia.

MIDAS-DOD DJF [01\_Jan\_2003-31\_Dec\_2017]

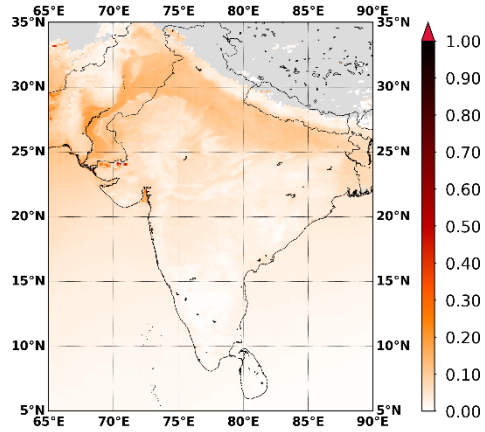

(i)

MIDAS-DOD MAM [01\_Jan\_2003-31\_Dec\_2017]

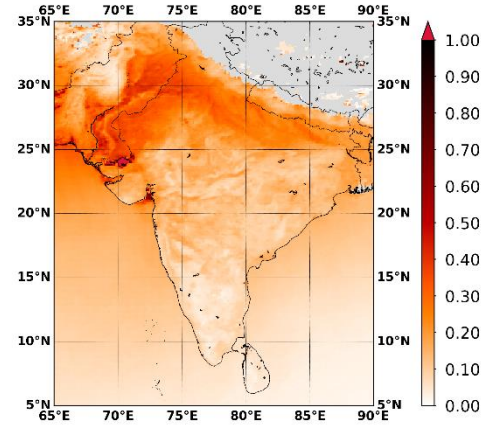

(ii)

MIDAS-DOD JJA [01\_Jan\_2003-31\_Dec\_2017]

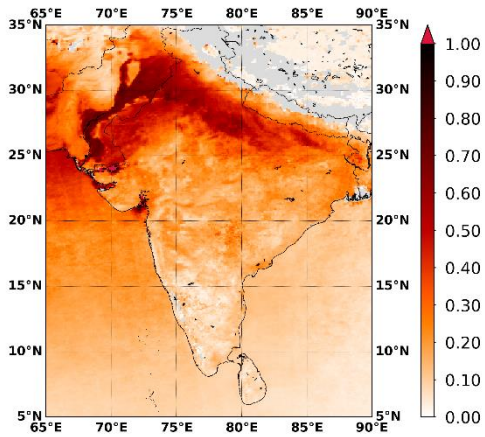

(iii)

MIDAS-DOD SON [01\_Jan\_2003-31\_Dec\_2017]

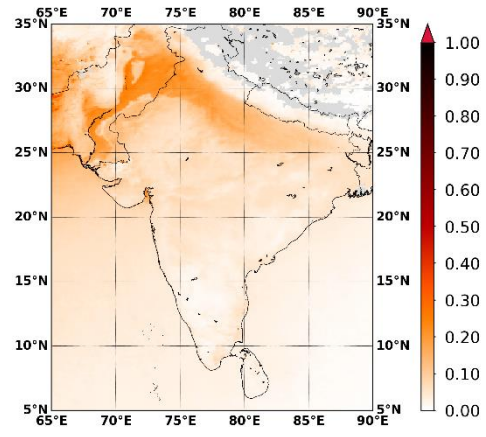

(iv)

Figure S4: As in Figure S1 but for the Indian subcontinent.

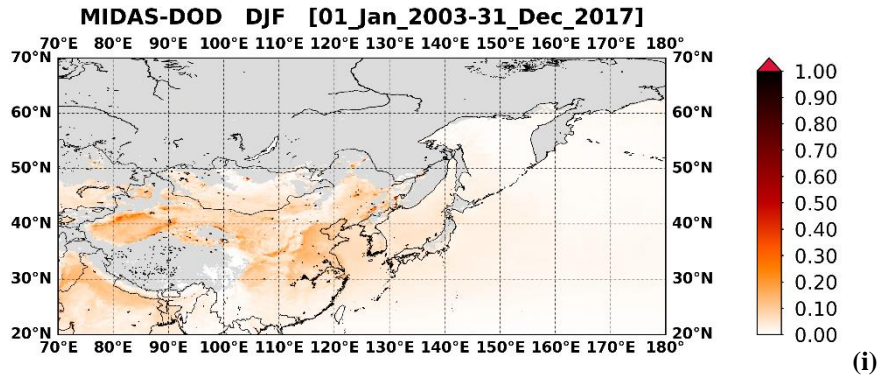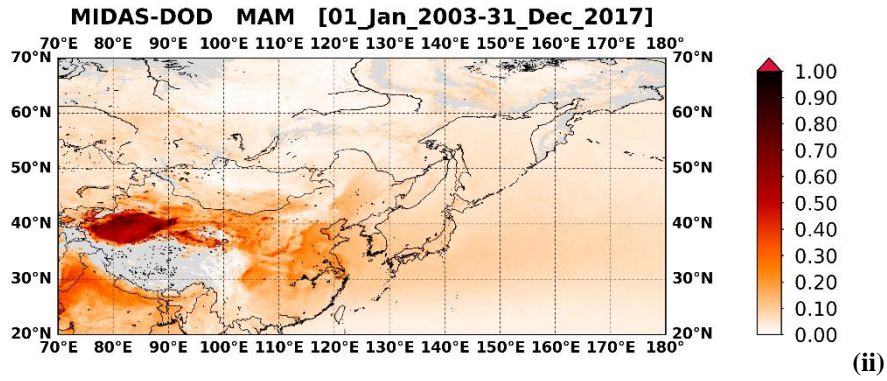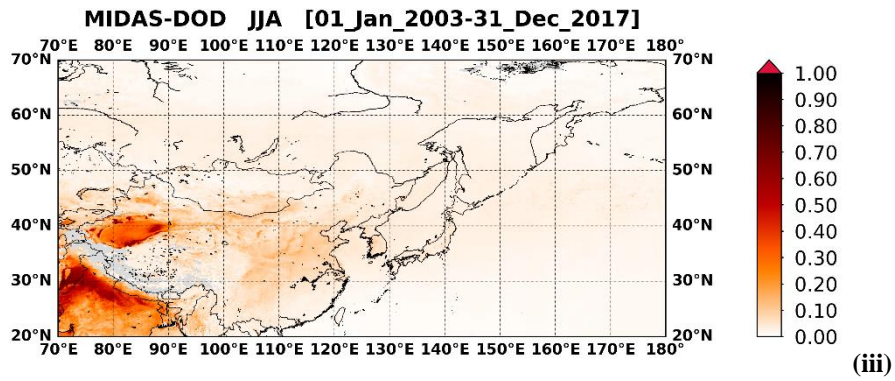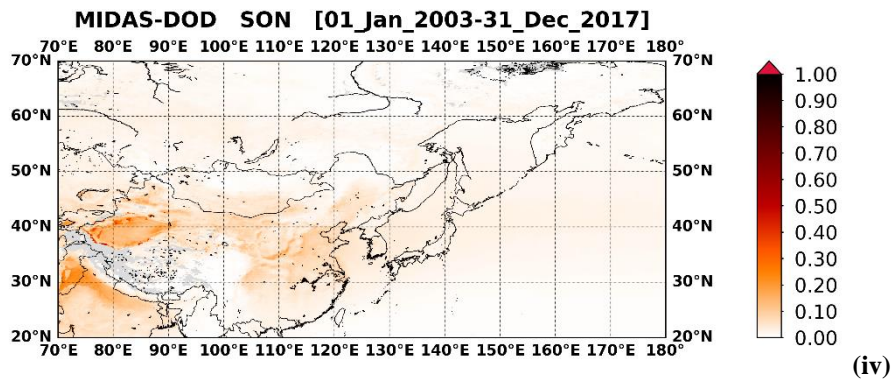

**Figure S5:** As in Figure S1 but for the East Asia and the Northern Pacific Ocean.

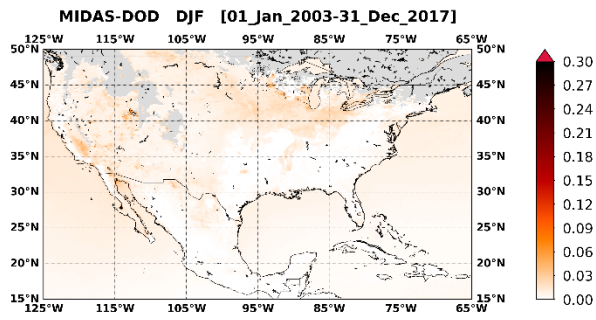

(i)

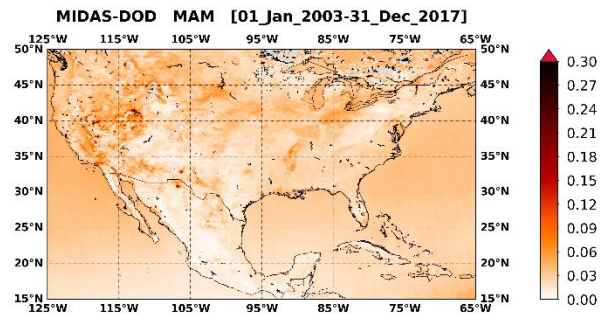

(ii)

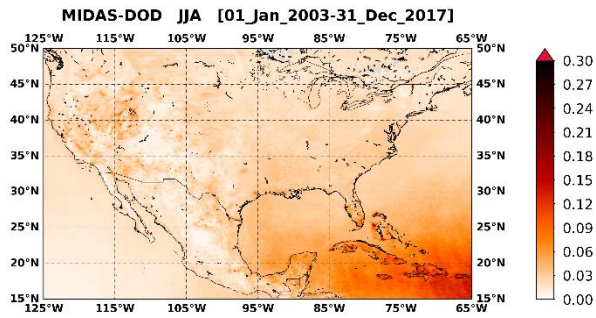

(iii)

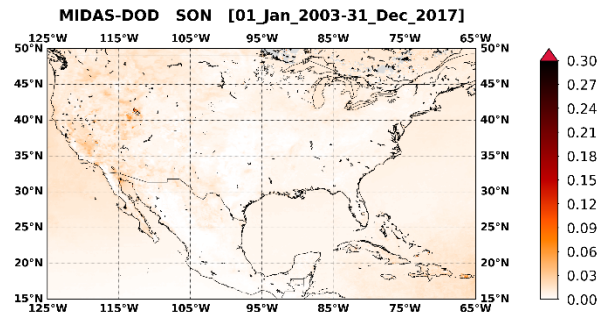

(iv)

Figure S6: As in Figure S1 but for the North America.

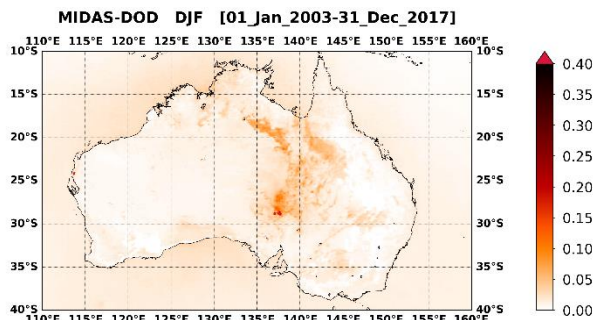

(i)

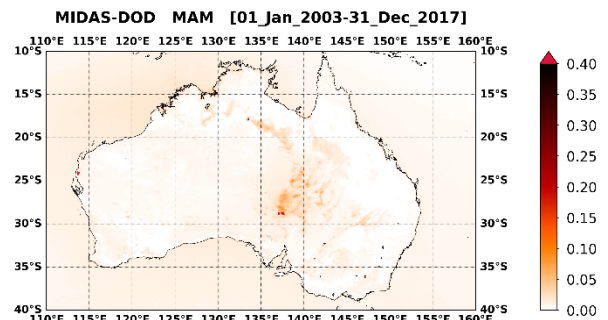

(ii)

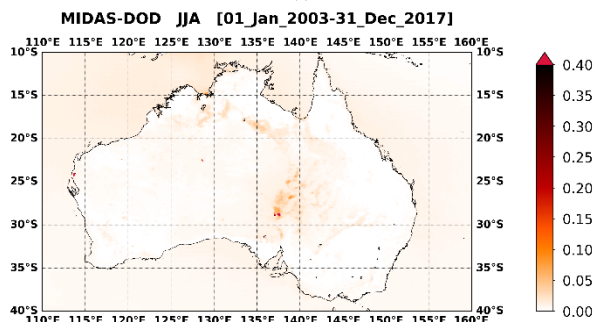

(iii)

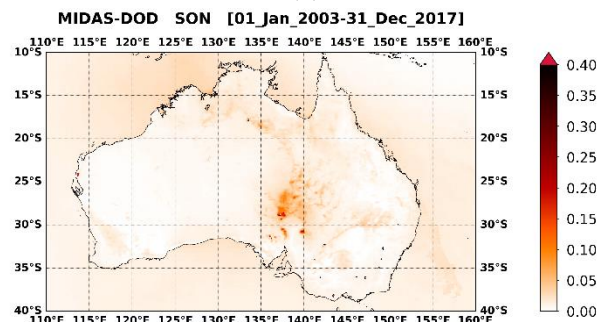

(iv)

Figure S7: As in Figure S1 but for the Australia.

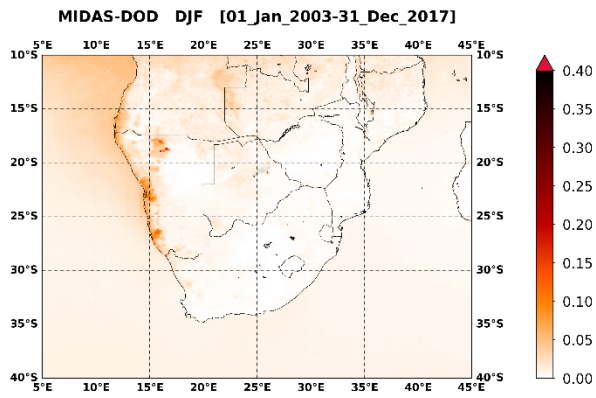

(i)

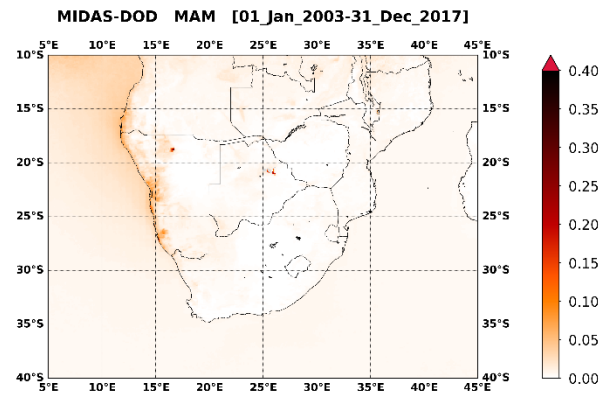

(ii)

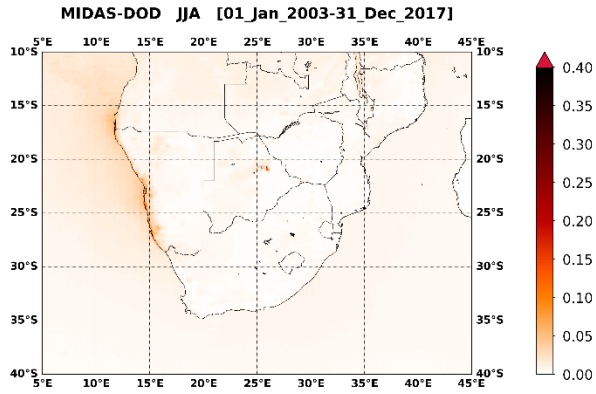

(iii)

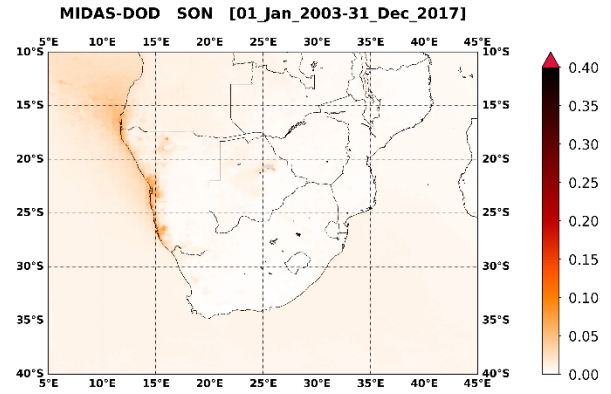

(iv)

**Figure S8:** As in Figure S1 but for the South Africa.

MIDAS-DOD DJF [01\_Jan\_2003-31\_Dec\_2017]

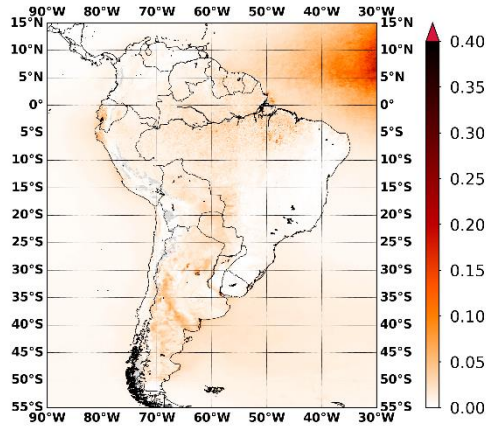

(i)

MIDAS-DOD MAM [01\_Jan\_2003-31\_Dec\_2017]

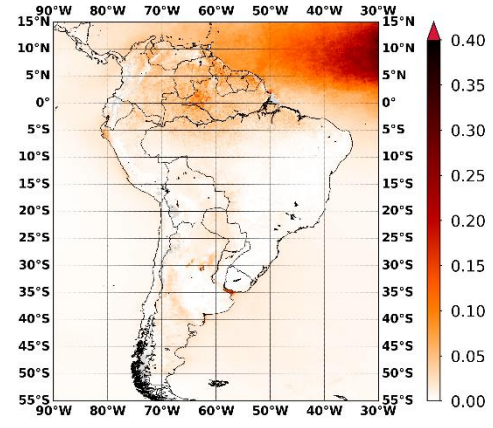

(ii)

MIDAS-DOD JJA [01\_Jan\_2003-31\_Dec\_2017]

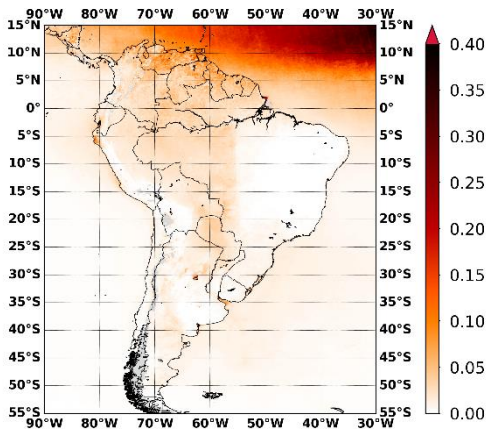

(iii)

MIDAS-DOD SON [01\_Jan\_2003-31\_Dec\_2017]

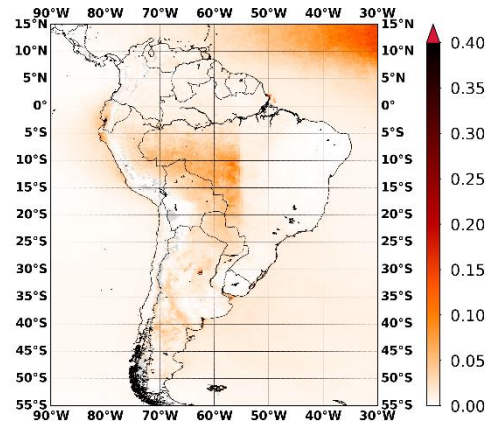

(iv)

Figure S9: As in Figure S1 but for the South America.
